# Supplementary material for: Inhibitors of Factor VIII in Hemophilia
Source: Atypon-hosted journal article supplement (doi:10.1056/nejmc091067), 2009-07-15
Supplement: nejm_santos_309sa1.pdf [file nejm_santos_309sa1.pdf]

## Supplementary Appendix

This appendix has been provided by the authors to give readers additional information about their work.

Supplement to: Santos A, Annichino-Bizzacchi JM, Ozelo MC. Inhibitors of factor VIII in hemophilia. *N Engl J Med* 2009;361:309-10.

**Table 1. Factor VIII haplotype frequencies and the prevalence of inhibitors in severe hemophilia A patients from Brazil.**

|                                                    | FVIII haplotypes* |               |                |               |                |               |                |               |                |               | P value‡ |
|----------------------------------------------------|-------------------|---------------|----------------|---------------|----------------|---------------|----------------|---------------|----------------|---------------|----------|
|                                                    | All               |               | H1             |               | H2             |               | H1+H2          |               | H3             |               |          |
|                                                    | Inhibitor†        |               | Inhibitor      |               | Inhibitor      |               | Inhibitor      |               | Inhibitor      |               |          |
|                                                    | Yes<br>no. (%)    | No<br>no. (%) | Yes<br>no. (%) | No<br>no. (%) | Yes<br>no. (%) | No<br>no. (%) | Yes<br>no. (%) | No<br>no. (%) | Yes<br>no. (%) | No<br>no. (%) |          |
| <b>African-Brazilians (n= 77 from 51 families)</b> |                   |               |                |               |                |               |                |               |                |               |          |
|                                                    | 24 (31)           | 53 (69)       | 16 (21)        | 32 (41)       | 7 (9)          | 13 (17)       | 23 (30)        | 45 (58)       | 1 (1)          | 8 (11)        | 0.26     |
| <b>Mean age, yrs [range]</b>                       | 22.4 [4-61]       | 19.1 [2-45]   | 24.6 [4-61]    | 19.9 [2-45]   | 18.7 [5-37]    | 20.8 [6-43]   | 20.2 [4-61]    | 20.2 [2-45]   | 13 [13]        | 12.9 [6-21]   |          |
| <b>FVIII mutation type§</b>                        |                   |               |                |               |                |               |                |               |                |               |          |
| High-risk for inhibitor                            | 14 (18)           | 37 (48)       | 10 (13)        | 23 (30)       | 3 (4)          | 8 (10)        | 13 (17)        | 31 (40)       | 1 (1)          | 6 (8)         | 0.66     |
| Low-risk for inhibitor                             | 0                 | 1 (1)         | 0              | 1 (1)         | 0              | 0             | 0              | 1 (1)         | 0              | 0             |          |
| Not determined¶                                    | 10 (13)           | 15 (20)       | 6 (8)          | 8 (10)        | 4 (5)          | 5 (7)         | 10 (13)        | 13 (17)       | 0              | 2 (3)         | 0.50     |
| <b>Caucasians (n= 71 from 52 families)</b>         |                   |               |                |               |                |               |                |               |                |               |          |
|                                                    | 14 (20)           | 57 (80)       | 9 (13)         | 47 (66)       | 5 (7)          | 10 (14)       | 14 (20)        | 57 (80)       | 0              | 0             |          |
| <b>Mean age, yrs [range]</b>                       | 24.3 [5-71]       | 24.8 [3-69]   | 27.8 [5-71]    | 24.7 [3-69]   | 18 [9-36]      | 25 [7-45]     | 24.3 [5-71]    | 24.8 [3-69]   |                |               |          |
| <b>FVIII mutation type§</b>                        |                   |               |                |               |                |               |                |               |                |               |          |
| High-risk for inhibitor                            | 11(15)            | 34 (48)       | 6 (8)          | 29 (41)       | 5 (7)          | 5 (7)         | 11 (15)        | 34 (48)       |                |               |          |
| Low-risk for inhibitor                             | 0                 | 6 (8)         | 0              | 3 (4)         | 0              | 3 (4)         | 0              | 6 (8)         |                |               |          |
| Not determined¶                                    | 3 (5)             | 17 (24)       | 3 (5)          | 15 (21)       | 0              | 2 (3)         | 3 (5)          | 17 (24)       |                |               |          |

\* Of all six possible factor VIII haplotypes (H1 to H6) only H1, H2, and H3 were identified.

† Inhibitor was defined by Bethesda titers of 0.6 BU/mL or higher.

‡ Two-sided Fisher's exact test was used to compare the two groups (H1+H2) and H3 for the presence of inhibitor.

§ Factor VIII gene mutations identified according to the risk for inhibitors development. High-risk: factor VIII intron 22 and intron 1 inversions, nonsense mutations, and small deletion non-A run. Low-risk: missense mutations at A1 or A3 domain, and small insertion A-run.

¶ Among the cases that the mutation were not determined, both factor VIII intron 22 and intron 1 inversions were excluded.
